# Supplementary material for: FBW7 (F-box and WD Repeat Domain-Containing 7) Negatively Regulates Glucose Metabolism by Targeting the c-Myc/TXNIP (Thioredoxin-Binding Protein) Axis in Pancreatic Cancer
Source: Oxford University Press journal article supplement (doi:10.1158/1078-0432.ccr-15-2380), 2016-03-16
Supplement: 10780432ccr152380-sup-156390_2_supp_3355025_k2jlch.docx [file 10780432ccr152380-sup-156390_2_supp_3355025_k2jlch.docx]

**Supplementary information Table S1.**

Clinicopathological features and correlation of TXNIP expression in PDAC.

| **Table 1. Clinicopathological features and correlation of TXNIP expression in PDAC** | | | | |
| --- | --- | --- | --- | --- |
|  |  | **TXNIP-Low** | **TXNIP-High** |  |
| **Characteristics** | **No.** | **score(-/+)(n=61)** | **score(++/+++)(n=25)** | **P Value** |
| Age(y) |  |  |  | 0.812 |
| <60 | 43 | 30 | 13 |  |
| ≥60 | 43 | 31 | 12 |  |
| Gendar |  |  |  | 0.235 |
| Female | 36 | 28 | 8 |  |
| Male | 50 | 33 | 17 |  |
| Tumor size(cm) |  |  |  | 0.002 |
| <4.0 | 50 | 29 | 21 |  |
| ≥4.0 | 36 | 32 | 4 |  |
| Tumor differentiation |  |  |  | <0.001 |
| Well | 14 | 5 | 9 |  |
| Moderate | 43 | 29 | 14 |  |
| Poor | 29 | 27 | 2 |  |
| Lymph node status(stage) |  |  |  | 0.112 |
| Negative(ⅡA) | 58 | 38 | 20 |  |
| Positive(ⅡB) | 28 | 23 | 5 |  |
| Vessel Infiltration |  |  |  | 0.888 |
| Negative | 75 | 53 | 22 |  |
| Positive | 11 | 8 | 3 |  |
| Nerve Infiltration |  |  |  | 0.765 |
| Negative | 19 | 14 | 5 |  |
| Positive | 67 | 47 | 20 |  |

TXNIPLow--negative/weak TXNIP expression; TXNIPHigh--moderate/strong TXNIP expression
